# Supplementary material
Source: bioRxiv or medRxiv preprint supplement (https://medrxiv.org/highwire/filestream/82786/field_highwire_adjunct_files/0/2020.05.18.20106146-1.pdf)
Supplement: Supplementary file [file 2020.05.18.20106146-1.pdf]

Supporting information file

**Forecasting COVID-19 cases and deaths in epidemic-mitigating European countries by Richards function-based regression analyses**

**Results**

**Table S1 Parameters of Richards function-based regression analysis for cumulative COVID-19 confirmed cases in the 10 European countries.**

| Parameter | Italy    |         | Spain    |         | France      |         | Germany  |         | Turkey      |         |
|-----------|----------|---------|----------|---------|-------------|---------|----------|---------|-------------|---------|
|           | Value    | Error   | Value    | Error   | Value       | Error   | Value    | Error   | Value       | Error   |
| <i>a</i>  | 240354   | 1318    | 294054   | 4043    | 178498      | 834     | 176868   | 706     | 155408      | 1028    |
| <i>xc</i> | 32.12028 | 0.27049 | 37.31981 | 0.56518 | 40.91476    | 0.28219 | 34.91067 | 0.25583 | 49.3556     | 0.18713 |
| <i>d</i>  | 0.80821  | 0.02819 | 0.76337  | 0.06166 | 1.41396     | 0.0623  | 0.89932  | 0.03642 | 1.03015     | 0.03342 |
| <i>k</i>  | 0.053    | 0.00121 | 0.05474  | 0.00291 | 0.10971     | 0.00361 | 0.07942  | 0.00188 | 0.07783     | 0.00201 |
|           | Belgium  |         | Ireland  |         | Netherlands |         | Portugal |         | Switzerland |         |
|           | Value    | Error   | Value    | Error   | Value       | Error   | Value    | Error   | Value       | Error   |
| <i>a</i>  | 57890    | 374     | 23959    | 191     | 46160       | 271     | 30147    | 259     | 30680       | 65      |
| <i>xc</i> | 36.95874 | 0.23567 | 44.47183 | 0.29513 | 35.37781    | 0.23206 | 33.51374 | 0.34701 | 24.20301    | 0.17438 |
| <i>d</i>  | 1.09785  | 0.03868 | 1.84194  | 0.09154 | 1.16186     | 0.03836 | 0.81291  | 0.04345 | 0.93846     | 0.02773 |
| <i>k</i>  | 0.07354  | 0.00204 | 0.1213   | 0.00557 | 0.0736      | 0.00194 | 0.06315  | 0.00223 | 0.09252     | 0.00149 |

**Table S2 Parameters of Richards function-based regression analysis for cumulative COVID-19 deaths in the 10 European countries.**

| Parameter | Italy    |         | Spain    |         | France      |         | Germany  |         | Turkey      |         |
|-----------|----------|---------|----------|---------|-------------|---------|----------|---------|-------------|---------|
|           | Value    | Error   | Value    | Error   | Value       | Error   | Value    | Error   | Value       | Error   |
| <i>a</i>  | 33490    | 285     | 28151    | 216     | 27828       | 166     | 8743     | 76      | 4500        | 32      |
| <i>xc</i> | 35.86071 | 0.36342 | 38.66302 | 0.38032 | 44.45411    | 0.27251 | 49.36724 | 0.22307 | 53.77353    | 0.14006 |
| <i>d</i>  | 0.8521   | 0.04117 | 0.85966  | 0.05096 | 1.03108     | 0.04843 | 1.00387  | 0.03824 | 1.13704     | 0.02978 |
| <i>k</i>  | 0.05482  | 0.00185 | 0.07099  | 0.00264 | 0.09105     | 0.0029  | 0.07135  | 0.00224 | 0.07661     | 0.00185 |
|           | Belgium  |         | Ireland  |         | Netherlands |         | Portugal |         | Switzerland |         |
|           | Value    | Error   | Value    | Error   | Value       | Error   | Value    | Error   | Value       | Error   |
| <i>a</i>  | 9252     | 71      | 1532     | 19      | 6237        | 52      | 1376     | 10      | 1956        | 8       |
| <i>xc</i> | 41.93277 | 0.26947 | 51.64532 | 0.36378 | 37.80534    | 0.25196 | 40.84466 | 0.17749 | 35.54139    | 0.18411 |
| <i>d</i>  | 1.08113  | 0.05238 | 2.23702  | 0.1697  | 0.87436     | 0.0346  | 0.86026  | 0.02534 | 1.04379     | 0.03051 |
| <i>k</i>  | 0.09216  | 0.00333 | 0.16038  | 0.01213 | 0.06136     | 0.00184 | 0.05795  | 0.0014  | 0.08284     | 0.0017  |

**Figure S1**

**A** Daily New Cases in the United Kingdom

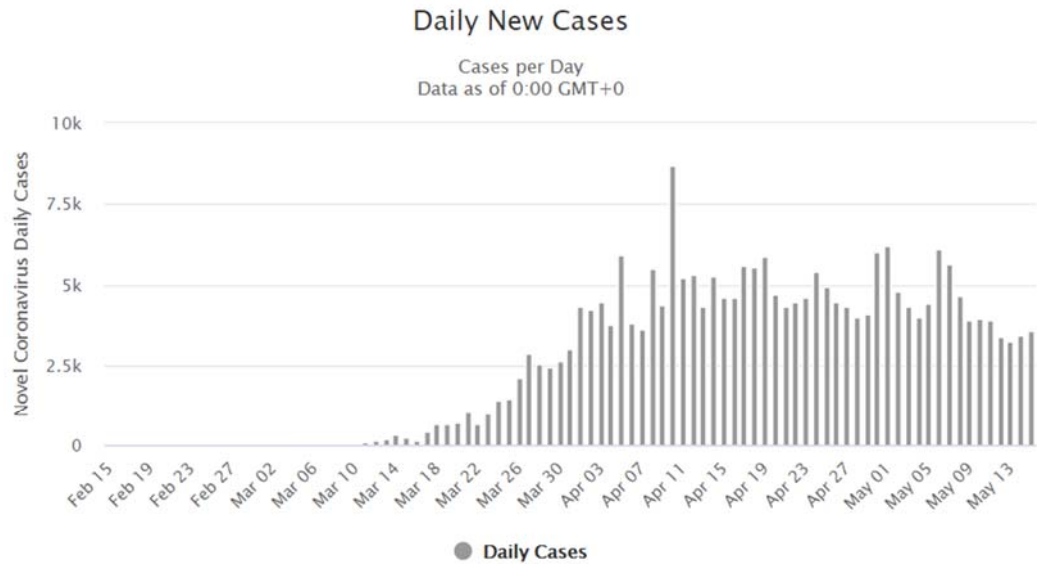

**B** Daily New Cases in Sweden

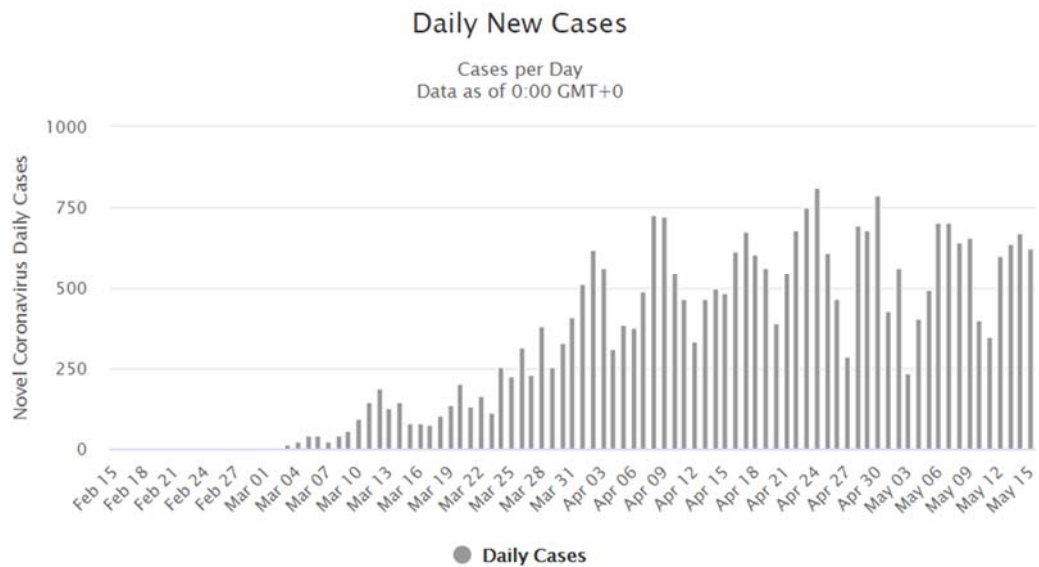

**Figure S1 Daily new cases in UK and Sweden.**

Graphs, as downloaded from the website of Worldometer, show that daily new cases in these two countries are almost constant since April, and significant declining as observed in the 10 European countries we analyzed has not yet occurred.
